# Supplementary material for: Group 1 and group 2 metal complexes supported by a bidentate bulky iminopyrrolyl ligand: synthesis, structural diversity, and ε-caprolactone polymerization study
Source: Royal Society of Chemistry journal article supplement (doi:10.1039/c5dt03222a), 2015-01-01
Supplement: c5dt03222a1.pdf [file c5dt03222a1.pdf]

## *Supporting Information for*

### **Group 1 and group 2 metal complexes supported by bidentate bulky iminopyrrolyl ligand: synthesis, structural diversity, and $\epsilon$ -caprolactone polymerization study**

Ravi K. Kottalanka, A. Harinath, Supriya Rej and Tarun K. Panda\*

*Department of Chemistry, Indian Institute of Technology Hyderabad, Ordinance Factory Estate, Yeddumailaram 502205, Telangana, India.*

#### **Table of Contents**

##### **1. Table TS1.** Crystal data and data collection parameters

- S1.**  $^1\text{H}$  NMR spectrum (400 MHz, 25°C,  $\text{CDCl}_3$ ) of [2-( $\text{Ph}_3\text{CN}=\text{CH}$ ) $\text{C}_4\text{H}_3\text{NH}$ ] (**1-H**)
- S2.**  $^{13}\text{C}$  NMR spectrum (100 MHz, 25°C,  $\text{CDCl}_3$ ) of [2-( $\text{Ph}_3\text{CN}=\text{CH}$ ) $\text{C}_4\text{H}_3\text{NH}$ ] (**1-H**)
- S3.**  $^1\text{H}$  NMR spectrum (400 MHz, 25°C,  $\text{C}_6\text{D}_6$ ) of [(THF) $_2$ Li(2-( $\text{Ph}_3\text{CN}=\text{CH}$ ) $\text{C}_4\text{H}_3\text{N}$ )] (**2**)
- S4.**  $^{13}\text{C}$  NMR spectrum (100 MHz, 25°C,  $\text{C}_6\text{D}_6$ ) of [(2-( $\text{Ph}_3\text{CN}=\text{CH}$ ) $\text{C}_4\text{H}_3\text{N}$ )Li(THF) $_2$ ] (**2**)
- S5.**  $^1\text{H}$  NMR spectrum (400 MHz, 25°C,  $\text{C}_6\text{D}_6$ ) of [{2-( $\text{Ph}_3\text{CN}=\text{CH}$ ) $\text{C}_4\text{H}_3\text{N}$ }Na(THF) $_2$ ] (**3**)
- S6.**  $^{13}\text{C}$  NMR spectrum (100 MHz, 25°C,  $\text{C}_6\text{D}_6$ ) of [{2-( $\text{Ph}_3\text{CN}=\text{CH}$ ) $\text{C}_4\text{H}_3\text{N}$ }Na(THF) $_2$ ] (**3**)
- S7.**  $^1\text{H}$  NMR spectrum (400 MHz, 25°C,  $\text{C}_6\text{D}_6$ ) of [{2-( $\text{Ph}_3\text{CN}=\text{CH}$ ) $\text{C}_4\text{H}_3\text{N}$ }K(THF) $_{0.5}$ ] $_4$  (**4**)
- S8.**  $^{13}\text{C}$  NMR spectrum (100 MHz, 25°C,  $\text{C}_6\text{D}_6$ ) of [{2-( $\text{Ph}_3\text{CN}=\text{CH}$ ) $\text{C}_4\text{H}_3\text{N}$ }K(THF) $_{0.5}$ ] $_4$  (**4**)
- S9.**  $^1\text{H}$  NMR spectrum (400 MHz, 25°C,  $\text{C}_6\text{D}_6$ ) of [{2-( $\text{Ph}_3\text{CN}=\text{CH}$ ) $\text{C}_4\text{H}_3\text{N}$ } {PhCH $_2$ }Mg(THF) $_2$ ] (**5**)
- S10.**  $^{13}\text{C}$  NMR spectrum (100 MHz, 25°C,  $\text{C}_6\text{D}_6$ ) of [{2-( $\text{Ph}_3\text{CN}=\text{CH}$ ) $\text{C}_4\text{H}_3\text{N}$ } {PhCH $_2$ }Mg(THF) $_2$ ] (**5**)
- S11.**  $^1\text{H}$  NMR spectrum (400 MHz, 25°C,  $\text{C}_6\text{D}_6$ ) of [{2-( $\text{Ph}_3\text{CN}=\text{CH}$ ) $\text{C}_4\text{H}_3\text{N}$ ] $_2$ Mg(THF) $_2$ ] (**6**)
- S12.**  $^{13}\text{C}$  NMR spectrum (100 MHz, 25°C,  $\text{C}_6\text{D}_6$ ) of [{2-( $\text{Ph}_3\text{CN}=\text{CH}$ ) $\text{C}_4\text{H}_3\text{N}$ ] $_2$ Mg(THF) $_2$ ] (**6**)
- S13.**  $^1\text{H}$  NMR spectrum (400 MHz, 25°C,  $\text{C}_6\text{D}_6$ ) of [{2-( $\text{Ph}_3\text{CN}=\text{CH}$ ) $\text{C}_4\text{H}_3\text{N}$ ] $_2$ Ca(THF) $_2$ ] (**7**)
- S14.**  $^{13}\text{C}$  NMR spectrum (100 MHz, 25°C,  $\text{C}_6\text{D}_6$ ) of [{2-( $\text{Ph}_3\text{CN}=\text{CH}$ ) $\text{C}_4\text{H}_3\text{N}$ ] $_2$ Ca(THF) $_2$ ] (**7**)

- S15.** <sup>1</sup>H NMR spectrum (400 MHz, 25°C, C<sub>6</sub>D<sub>6</sub>) of [ $\{2-(\text{Ph}_3\text{CN}=\text{CH})\text{C}_4\text{H}_3\text{N}\}_2\text{Sr}(\text{THF})_2$ ] (**8**)
- S16.** <sup>13</sup>C NMR spectrum (100 MHz, 25°C, C<sub>6</sub>D<sub>6</sub>) of [ $\{2-(\text{Ph}_3\text{CN}=\text{CH})\text{C}_4\text{H}_3\text{N}\}_2\text{Sr}(\text{THF})_2$ ] (**8**)
- S17.** <sup>1</sup>H NMR spectrum (400 MHz, 25°C, C<sub>6</sub>D<sub>6</sub>) of [ $\{2-(\text{Ph}_3\text{CN}=\text{CH})\text{C}_4\text{H}_3\text{N}\}_2\text{Ba}(\text{THF})_3$ ] (**9**)
- S18.** <sup>13</sup>C NMR spectrum (100 MHz, 25°C, C<sub>6</sub>D<sub>6</sub>) of [ $\{2-(\text{Ph}_3\text{CN}=\text{CH})\text{C}_4\text{H}_3\text{N}\}_2\text{Ba}(\text{THF})_3$ ] (**9**)
- S19.** <sup>1</sup>H NMR spectrum (400 MHz, 25°C, CDCl<sub>3</sub>) of Poly(ε-Caprolactone) initiated by complex (**9**)
- S20.** <sup>13</sup>C NMR spectrum (100 MHz, 25°C, CDCl<sub>3</sub>) of Poly(ε-Caprolactone)

**Table TS 1:** Crystallographic details of details of ligand **1-H** and complexes **2-9**.

| Crystal                                     | 1-H                                                               | 2                                                                 | 3                                                                             | 4                                                                             | 5                                                                 |
|---------------------------------------------|-------------------------------------------------------------------|-------------------------------------------------------------------|-------------------------------------------------------------------------------|-------------------------------------------------------------------------------|-------------------------------------------------------------------|
| CCDC No.                                    | 1418542                                                           | 1418543                                                           | 1418544                                                                       | 1418545                                                                       | 1418546                                                           |
| Empirical formula                           | C <sub>24</sub> H <sub>20</sub> N <sub>2</sub>                    | C <sub>32</sub> H <sub>35</sub> LiN <sub>2</sub> O <sub>2</sub>   | C <sub>56</sub> H <sub>54</sub> N <sub>4</sub> Na <sub>2</sub> O <sub>2</sub> | C <sub>104</sub> H <sub>92</sub> K <sub>4</sub> N <sub>8</sub> O <sub>2</sub> | C <sub>39</sub> H <sub>42</sub> MgN <sub>2</sub> O <sub>2</sub>   |
| Formula weight                              | 336.42                                                            | 486.56                                                            | 861.01                                                                        | 1642.26                                                                       | 595.06                                                            |
| <i>T</i> (K)                                | 293(2)                                                            | 150(2)                                                            | 150(2)                                                                        | 150(2)                                                                        | 113(2)                                                            |
| <i>λ</i> (Å)                                | 1.54184                                                           | 1.54184                                                           | 1.54184                                                                       | 1.54184                                                                       | 0.71075                                                           |
| Crystal system                              | Monoclinic                                                        | Orthorhombic                                                      | Monoclinic                                                                    | Monoclinic                                                                    | Triclinic                                                         |
| Space group                                 | <i>P</i> 2 <sub>1</sub> / <i>c</i>                                | <i>P</i> <i>b c a</i>                                             | <i>P</i> 2 <sub>1</sub> / <i>c</i>                                            | <i>P</i> 2 <sub>1</sub> / <i>c</i>                                            | <i>P</i> -1                                                       |
| <i>a</i> (Å)                                | 11.7601(8)                                                        | 16.6177(16)                                                       | 9.3375(5)                                                                     | 16.7937(12)                                                                   | 9.530(3)                                                          |
| <i>b</i> (Å)                                | 10.7213(9)                                                        | 16.4089(8)                                                        | 17.8616(9)                                                                    | 10.7713(6)                                                                    | 17.850(6)                                                         |
| <i>c</i> (Å)                                | 29.0076(15)                                                       | 39.7532(16)                                                       | 15.0867(10)                                                                   | 24.1946(17)                                                                   | 20.350(7)                                                         |
| <i>α</i> (°)                                | 90                                                                | 90                                                                | 90                                                                            | 90                                                                            | 109.890(4)                                                        |
| <i>β</i> (°)                                | 98.480(7)                                                         | 90                                                                | 111.528(5)                                                                    | 90.543(8)                                                                     | 96.251(2)                                                         |
| <i>γ</i> (°)                                | 90                                                                | 90                                                                | 90                                                                            | 90                                                                            | 93.303(3)                                                         |
| <i>V</i> (Å <sup>3</sup> )                  | 3617.4(4)                                                         | 10839.8(12)                                                       | 2340.7(2)                                                                     | 4376.4(5)                                                                     | 3219.3(18)                                                        |
| <i>Z</i>                                    | 8                                                                 | 16                                                                | 2                                                                             | 2                                                                             | 4                                                                 |
| <i>D</i> <sub>calc</sub> g cm <sup>-3</sup> | 1.235                                                             | 1.193                                                             | 1.222                                                                         | 1.246                                                                         | 1.228                                                             |
| <i>μ</i> (mm <sup>-1</sup> )                | 0.557                                                             | 0.570                                                             | 1.54184                                                                       | 2.239                                                                         | 0.092                                                             |
| <i>F</i> (000)                              | 1424.0                                                            | 4160                                                              | 912                                                                           | 1728                                                                          | 1272                                                              |
| Theta range for data collection             | 6.16 to 143.63 deg.                                               | 3.47 to 71.08 deg.                                                | 4.01 to 70.95 deg.                                                            | 3.65 to 70.78 deg.                                                            | 3.02 to 27.00 deg.                                                |
| Limiting indices                            | -14<= <i>h</i> <=13<br>-11<= <i>k</i> <=13<br>-35<= <i>l</i> <=19 | -17<= <i>h</i> <=19<br>-18<= <i>k</i> <=19<br>-48<= <i>l</i> <=47 | -11<= <i>h</i> <=11,<br>-16<= <i>k</i> <=21,<br>-15<= <i>l</i> <=18           | -16<= <i>h</i> <=20<br>-13<= <i>k</i> <=12<br>-29<= <i>l</i> <=29             | -12<= <i>h</i> <=12<br>-21<= <i>k</i> <=22<br>-25<= <i>l</i> <=25 |
| Reflections collected / unique              | 13546 / 6866<br>[ <i>R</i> (int) = 0.0667]                        | 24230 / 8741<br>[ <i>R</i> (int) = 0.0562]                        | 10068 / 4424<br>[ <i>R</i> (int) = 0.0266]                                    | 21120 / 8234<br>[ <i>R</i> (int) = 0.0891]                                    | 30518 / 13802<br>[ <i>R</i> (int) = 0.0333]                       |

|                                   |                                             |                                             |                                                   |                                             |                                             |
|-----------------------------------|---------------------------------------------|---------------------------------------------|---------------------------------------------------|---------------------------------------------|---------------------------------------------|
| Completeness to theta = 71.25     | 96.6 % (70.94)                              | 83.3 % (71.08)                              | 97.7 %                                            | 97.7 % (70.78)                              | 98.2 % (27.00)                              |
| Absorption correction             | Multi-scan                                  | Multi-scan                                  | Multi-scan                                        | Multi-scan                                  | Multi-scan                                  |
| Max. and min. transmission        | 1.00000 and 0.25106                         | 0.91 and 0.86                               | 0.75 and 0.64                                     | 1.00000 and 0.62549                         | 0.9746 and 0.9728                           |
| Refinement method                 | Full-matrix least-squares on F <sup>2</sup> | Full-matrix least-squares on F <sup>2</sup> | Full-matrix least-squares on F <sup>2</sup>       | Full-matrix least-squares on F <sup>2</sup> | Full-matrix least-squares on F <sup>2</sup> |
| Data / restraints / parameters    | 6866/0/470                                  | 8741 / 0 / 679                              | 4424 / 0 / 289                                    | 8234 / 0 / 532                              | 13802 / 0 / 793                             |
| Goodness-of-fit on F <sup>2</sup> | 1.045                                       | 1.028                                       | 1.045                                             | 1.029                                       | 1.051                                       |
| Final R indices [I>2sigma(I)]     | R1 = 0.1059, wR2 = 0.2790                   | R1 = 0.0792, wR2 = 0.2056                   | R <sub>1</sub> = 0.0524, wR <sub>2</sub> = 0.1416 | R1 = 0.0796, wR2 = 0.2067                   | R1 = 0.0651, wR2 = 0.1577                   |
| R indices (all data)              | R1 = 0.1878, wR2 = 0.3599                   | R1 = 0.1315, wR2 = 0.2412                   | R <sub>1</sub> = 0.0597, wR <sub>2</sub> = 0.1492 | R1 = 0.1102, wR2 = 0.2461                   | R1 = 0.0988, wR2 = 0.1893                   |
| Largest diff. peak and hole       | 0.42 and -0.38 e.A <sup>-3</sup>            | 0.339 and -0.267 e.A <sup>-3</sup>          | 0.456 and -0.548 e.A <sup>-3</sup>                | 0.641 and -0.574 e.A <sup>-3</sup>          | 0.906 and -0.526 e.A <sup>-3</sup>          |

**Table TS 1:** Crystallographic details of details of ligand **1-H** and complexes **2-9** (contd).

| Crystal                                     | 6                                                               | 7                                                               | 8                                                                | 9                                                               |
|---------------------------------------------|-----------------------------------------------------------------|-----------------------------------------------------------------|------------------------------------------------------------------|-----------------------------------------------------------------|
| CCDC No.                                    | 1418547                                                         | 1418548                                                         | 1418549                                                          | 1418550                                                         |
| Empirical formula                           | C <sub>56</sub> H <sub>54</sub> MgN <sub>4</sub> O <sub>2</sub> | C <sub>66</sub> H <sub>70</sub> CaN <sub>4</sub> O <sub>4</sub> | C <sub>60</sub> H <sub>62</sub> N <sub>4</sub> O <sub>3</sub> Sr | C <sub>68</sub> H <sub>77</sub> BaN <sub>4</sub> O <sub>5</sub> |
| Formula weight                              | 839.34                                                          | 999.32                                                          | 974.76                                                           | 1167.68                                                         |
| T (K)                                       | 150(2)                                                          | 113(2)                                                          | 150(2)                                                           | 150(2)                                                          |
| λ (Å)                                       | 1.54184                                                         | 0.71075                                                         | 1.54184                                                          | 1.54184                                                         |
| Crystal system                              | Triclinic                                                       | Monoclinic                                                      | Triclinic                                                        | Triclinic                                                       |
| Space group                                 | <i>P</i> -1                                                     | <i>P</i> 2 <sub>1</sub> /n                                      | <i>P</i> -1                                                      | <i>P</i> -1                                                     |
| <i>a</i> (Å)                                | 9.9208(12)                                                      | 11.185(18)                                                      | 11.5131(13)                                                      | 10.7818(11)                                                     |
| <i>b</i> (Å)                                | 9.9609(15)                                                      | 13.42(2)                                                        | 13.2509(13)                                                      | 14.4888(15)                                                     |
| <i>c</i> (Å)                                | 12.4778(12)                                                     | 18.43(3)                                                        | 18.1457(15)                                                      | 21.2076(19)                                                     |
| α (°)                                       | 108.752(11)                                                     | 90                                                              | 75.334(8)                                                        | 109.626(9)                                                      |
| β (°)                                       | 92.798(9)                                                       | 104.24(2)                                                       | 78.968(9)                                                        | 93.344(8)                                                       |
| γ (°)                                       | 106.729(12)                                                     | 90                                                              | 71.140(10)                                                       | 106.825(9)                                                      |
| <i>V</i> (Å <sup>3</sup> )                  | 1104.5(3)                                                       | 2681(7)                                                         | 2516.1(4)                                                        | 2942.1(5)                                                       |
| <i>Z</i>                                    | 1                                                               | 2                                                               | 2                                                                | 2                                                               |
| <i>D</i> <sub>calc</sub> g cm <sup>-3</sup> | 1.262                                                           | 1.238                                                           | 1.287                                                            | 1.318                                                           |
| μ (mm <sup>-1</sup> )                       | 0.722                                                           | 0.170                                                           | 1.871                                                            | 5.668                                                           |

|                                   |                                                      |                                                      |                                                      |                                                      |
|-----------------------------------|------------------------------------------------------|------------------------------------------------------|------------------------------------------------------|------------------------------------------------------|
| <i>F</i> (000)                    | 446                                                  | 1068                                                 | 1024                                                 | 1218                                                 |
| Theta range for data collection   | 3.787 to 70.588 deg.                                 | 3.04 to 26.00 deg.                                   | 3.60 to 71.27deg.                                    | 3.33 to 71.43 deg.                                   |
| Limiting indices                  | -12<=h<=11,<br>-9<=k<=12,<br>-15<=l<=15              | -13<=h<=12<br>-15<=k<=16<br>-22<=l<=18               | -14<=h<=14<br>-11<=k<=16<br>-21<=l<=22               | -12<=h<=13,<br>-17<=k<=17,<br>-17<=l<=25             |
| Reflections collected / unique    | 7976 / 4126<br>[R(int) = 0.0321]                     | 11436 / 5075<br>[R(int) = 0.1009]                    | 19225 / 9452<br>[R(int) = 0.0559]                    | 21652 / 11049<br>[R(int) = 0.0796]                   |
| Completeness to theta = 71.25     | 99.7 % (67.68)                                       | 96.3 % (26.00)                                       | 96.7 % (71.27)                                       | 96.5 %                                               |
| Absorption correction             | Multi-scan                                           | Multi-scan                                           | Multi-scan                                           | Multi-scan                                           |
| Max. and min. transmission        | 1.00000 and 0.82260                                  | 0.9668 and 0.9668                                    | 1.00000 and 0.92842                                  | 1.000 and 0.51963                                    |
| Refinement method                 | Full-matrix least-squares on F <sup>2</sup>          |
| Data / restraints / parameters    | 4126 / 0 / 290                                       | 5075 / 0 / 331                                       | 9452 / 0 / 613                                       | 11049 / 0 / 703                                      |
| Goodness-of-fit on F <sup>2</sup> | 1.039                                                | 0.999                                                | 1.094                                                | 1.009                                                |
| Final R indices [I>2sigma(I)]     | R <sub>1</sub> = 0.0417,<br>wR <sub>2</sub> = 0.1019 | R <sub>1</sub> = 0.0766,<br>wR <sub>2</sub> = 0.1573 | R <sub>1</sub> = 0.0925,<br>wR <sub>2</sub> = 0.2361 | R <sub>1</sub> = 0.0667,<br>wR <sub>2</sub> = 0.1670 |
| R indices (all data)              | R <sub>1</sub> = 0.0539,<br>wR <sub>2</sub> = 0.1114 | R <sub>1</sub> = 0.1713,<br>wR <sub>2</sub> = 0.2128 | R <sub>1</sub> = 0.0975,<br>wR <sub>2</sub> = 0.2480 | R <sub>1</sub> = 0.0874,<br>wR <sub>2</sub> = 0.2011 |
| Largest diff. peak and hole       | 0.155 and -0.266<br>e.Å <sup>-3</sup>                | 0.393 and -0.361<br>e.Å <sup>-3</sup>                | 2.717 and -1.215<br>e.Å <sup>-3</sup>                | 1.832 and -2.737<br>e.Å <sup>-3</sup>                |

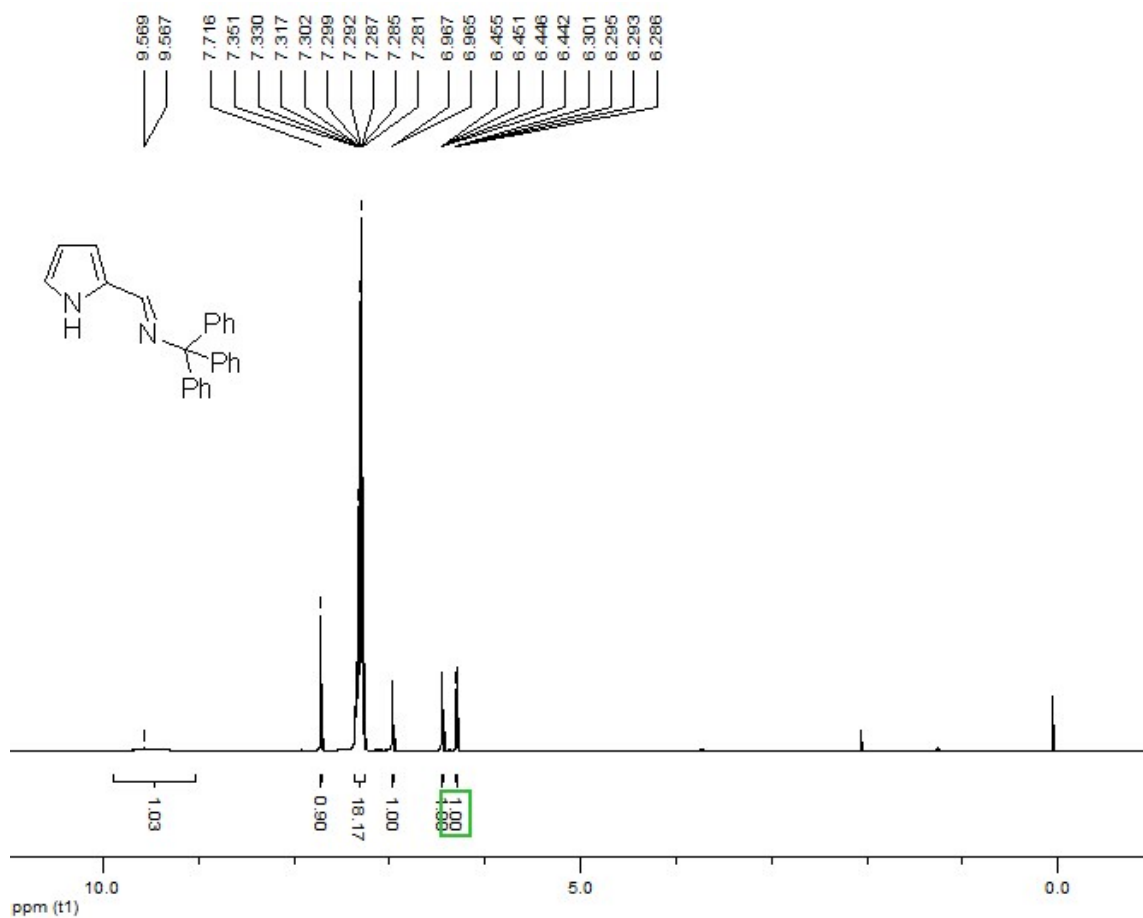

**S1.** <sup>1</sup>H NMR spectrum (400 MHz, 25°C, CDCl<sub>3</sub>) of [2-(Ph<sub>3</sub>CN=CH)C<sub>4</sub>H<sub>3</sub>NH] (**1-H**)

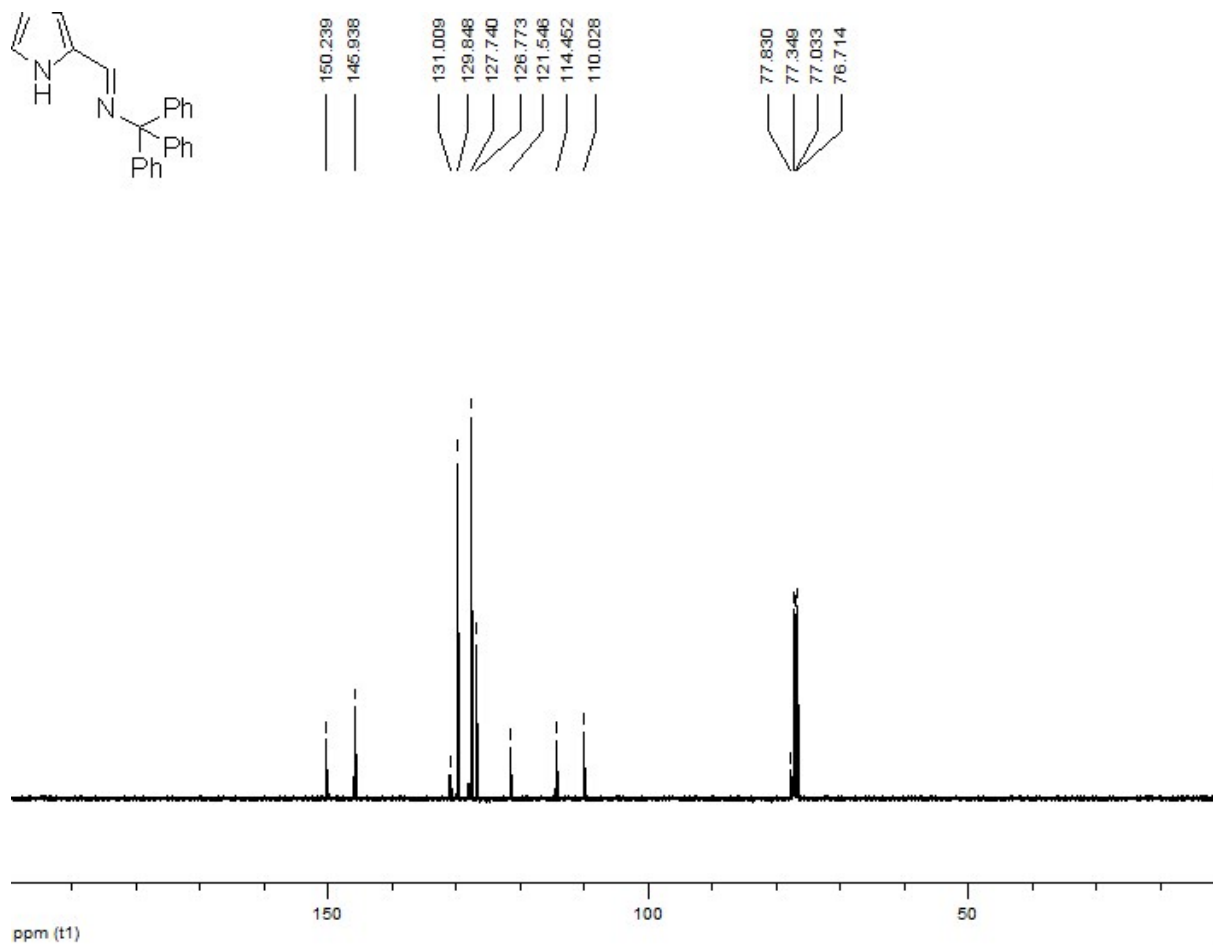

**S2.** <sup>13</sup>C NMR spectrum (100 MHz, 25°C, CDCl<sub>3</sub>) of [2-(Ph<sub>3</sub>CN=CH)C<sub>4</sub>H<sub>3</sub>NH] (**1-H**)

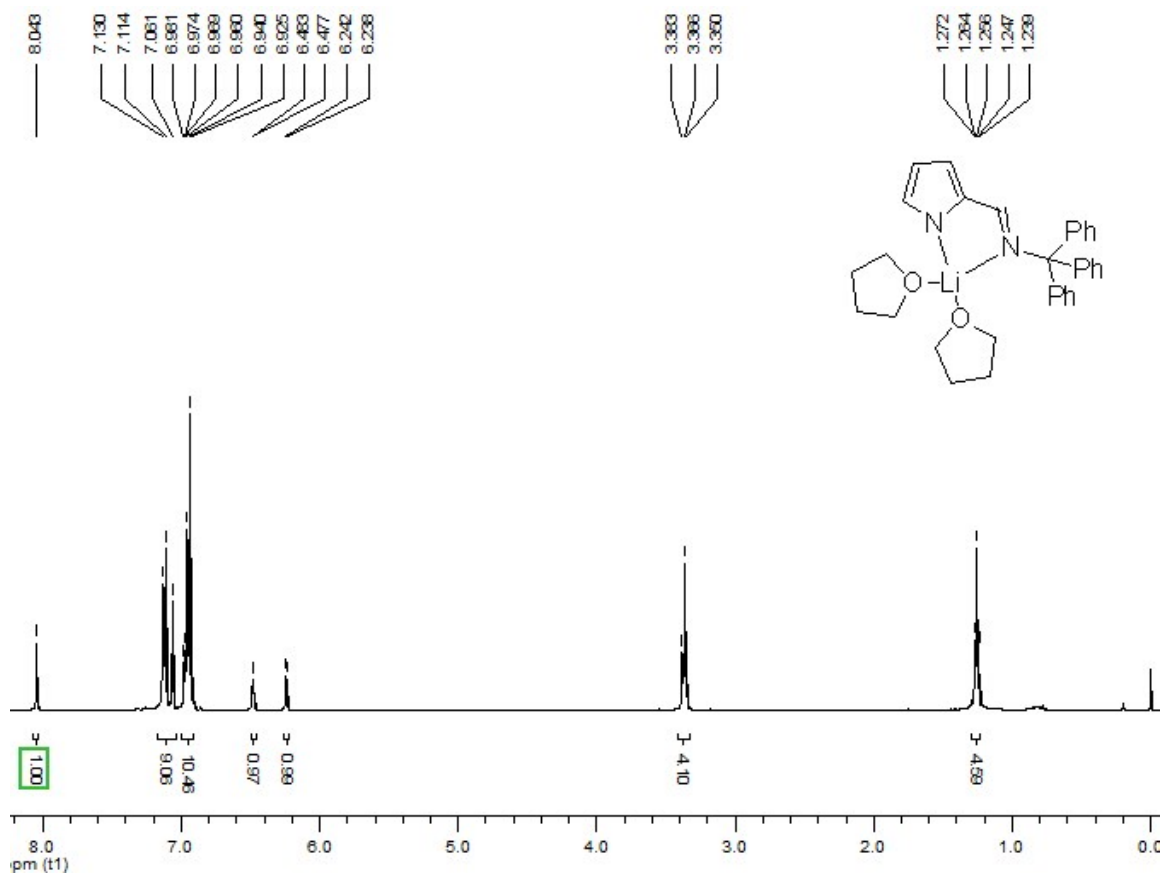

S3.  $^1\text{H}$  NMR spectrum (400 MHz, 25°C,  $\text{C}_6\text{D}_6$ ) of  $[(\text{THF})_2\text{Li}(2-(\text{Ph}_3\text{CN}=\text{CH})\text{C}_4\text{H}_3\text{N})]$  (2)

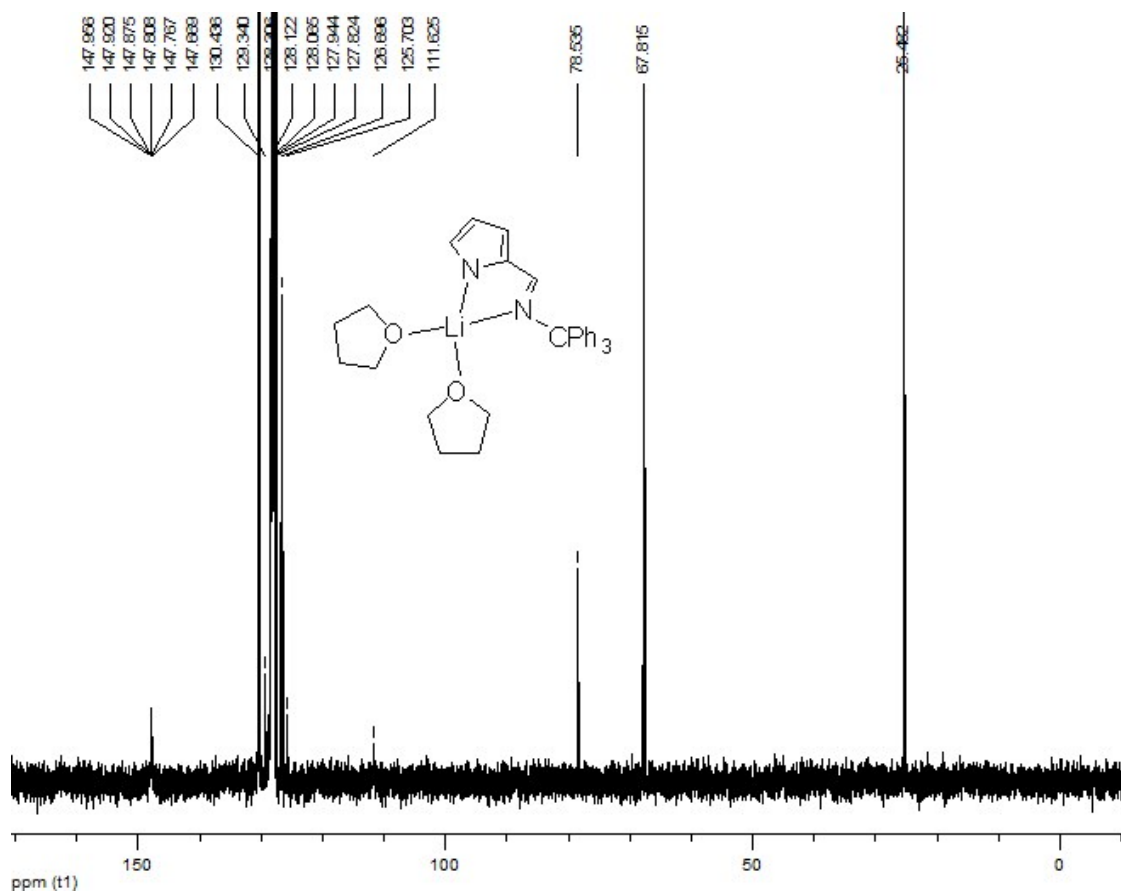

S4.  $^{13}\text{C}$  NMR spectrum (100 MHz,  $25^\circ\text{C}$ ,  $\text{C}_6\text{D}_6$ ) of  $[(2-(\text{Ph}_3\text{CN}=\text{CH})\text{C}_4\text{H}_3\text{N})\text{Li}(\text{THF})_2]$  (2)



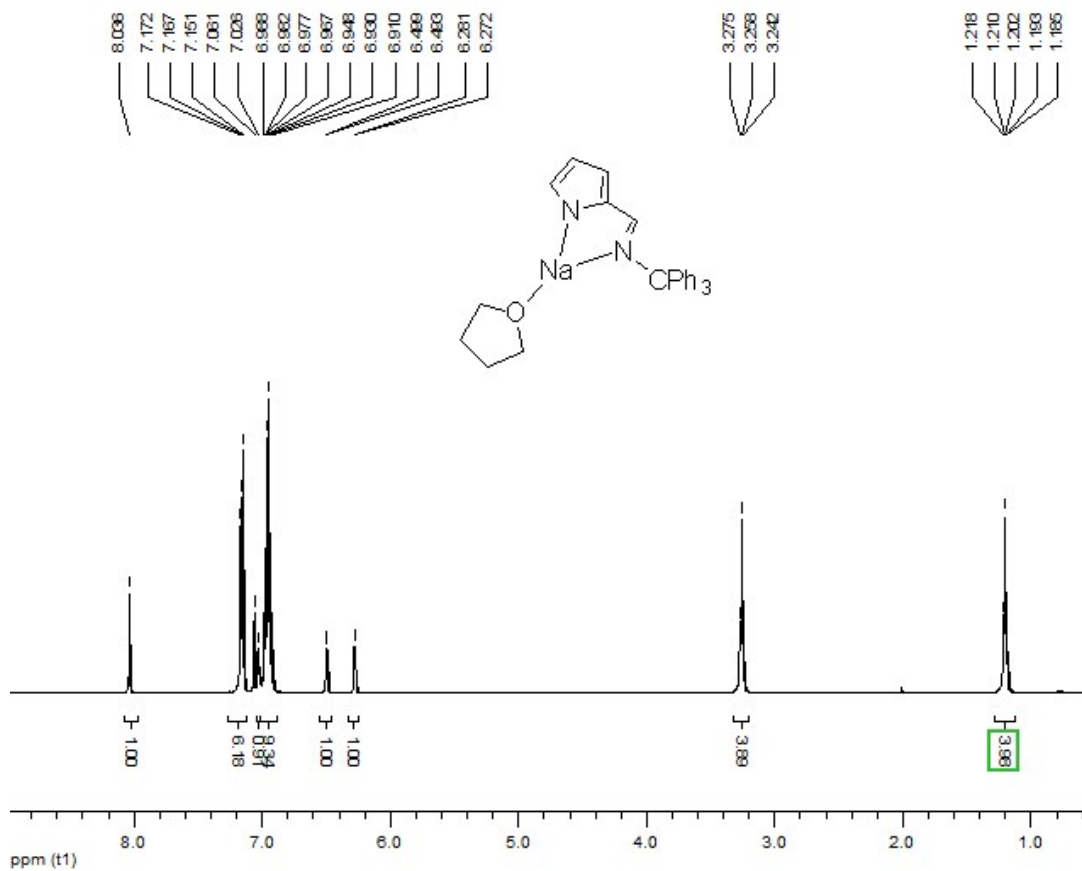

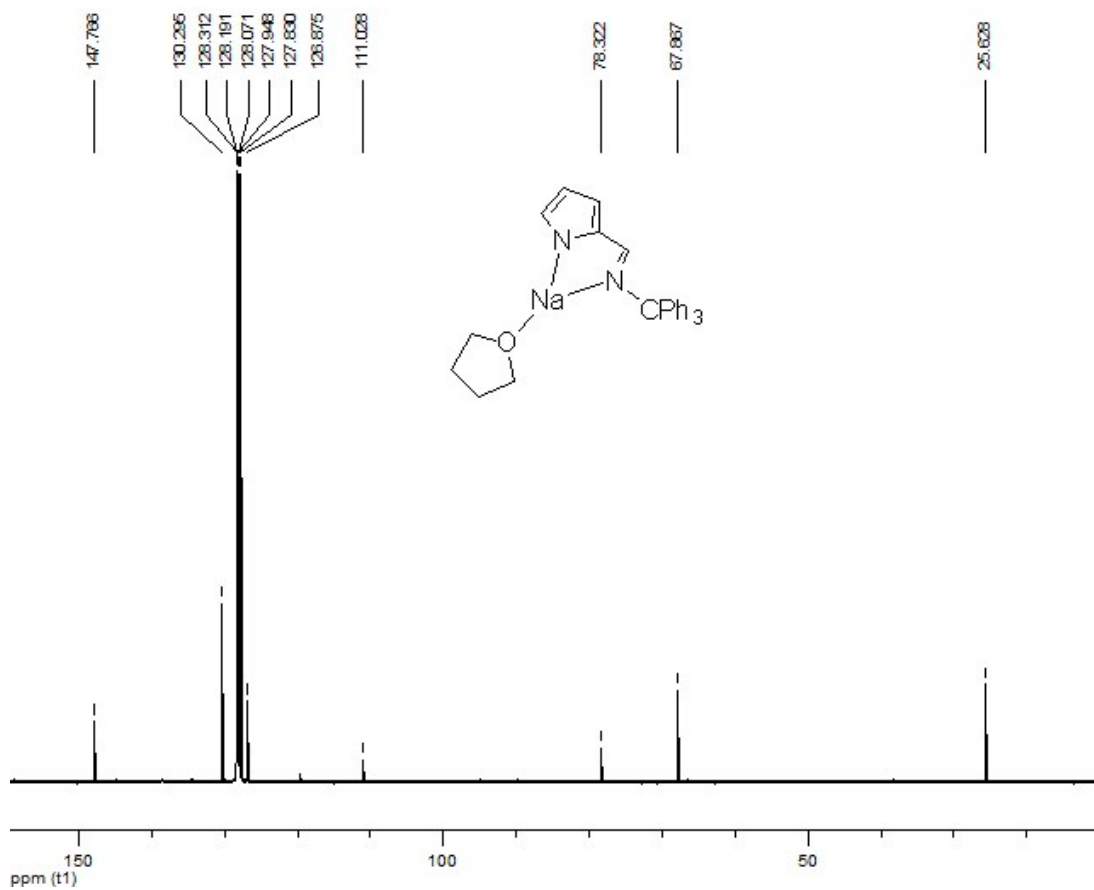

**S6.**  $^{13}\text{C}$  NMR spectrum (100 MHz,  $25^\circ\text{C}$ ,  $\text{C}_6\text{D}_6$ ) of  $[\{2-(\text{Ph}_3\text{CN}=\text{CH})\text{C}_4\text{H}_3\text{N}\}\text{Na}(\text{THF})_2]_2$  (**3**)

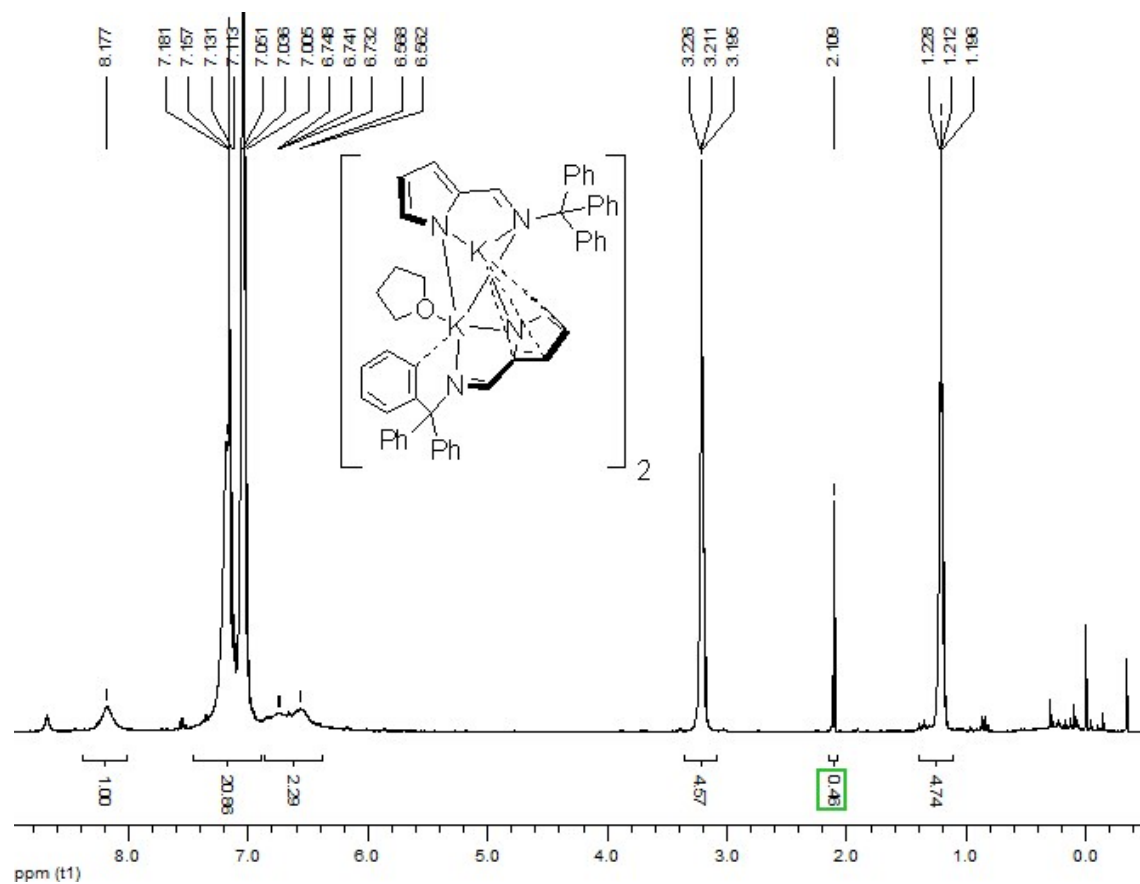

S7.  $^1\text{H}$  NMR spectrum (400 MHz,  $25^\circ\text{C}$ ,  $\text{C}_6\text{D}_6$ ) of  $[\{2-(\text{Ph}_3\text{CN}=\text{CH})\text{C}_4\text{H}_3\text{N}\}\text{K}(\text{THF})_{0.5}]_4$  (4)

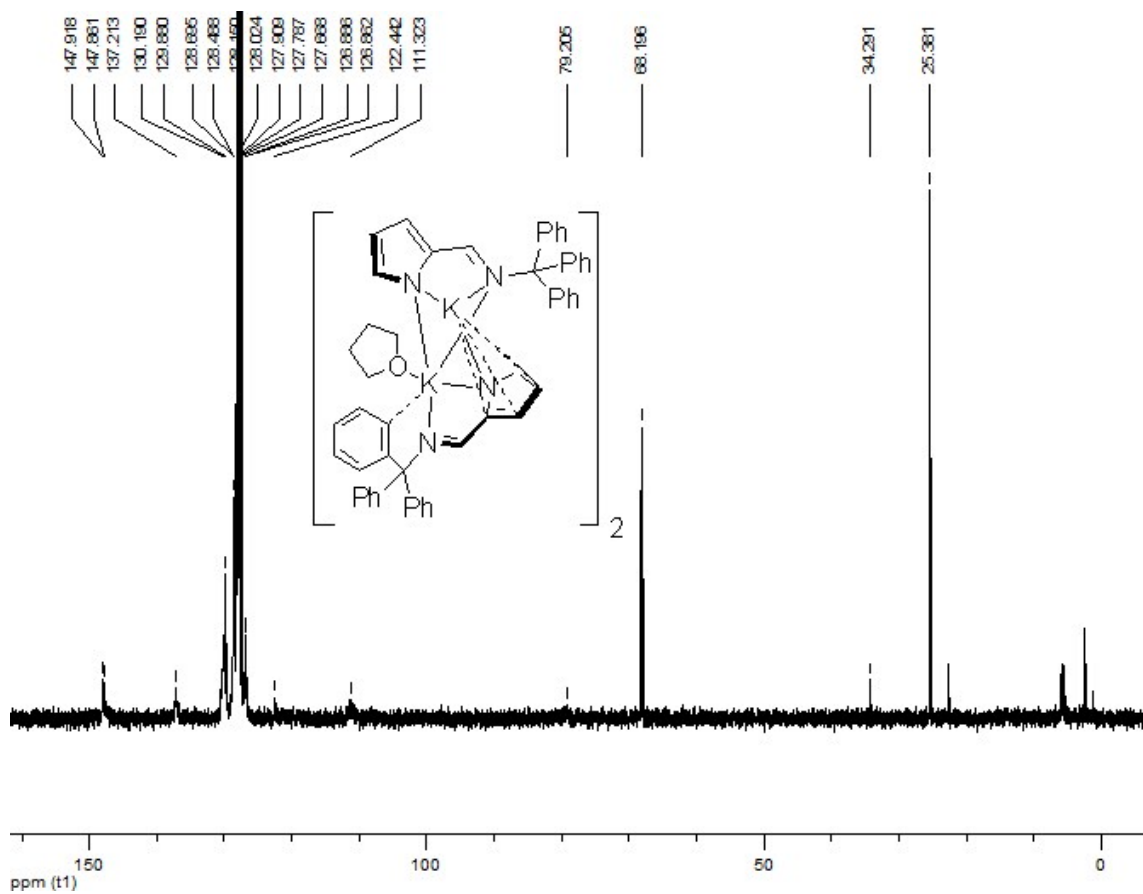

S8.  $^{13}\text{C}$  NMR spectrum (100 MHz,  $25^\circ\text{C}$ ,  $\text{C}_6\text{D}_6$ ) of  $[\{2-(\text{Ph}_3\text{CN}=\text{CH})\text{C}_4\text{H}_3\text{N}\}\text{K}(\text{THF})_{0.5}]_4$  (4)

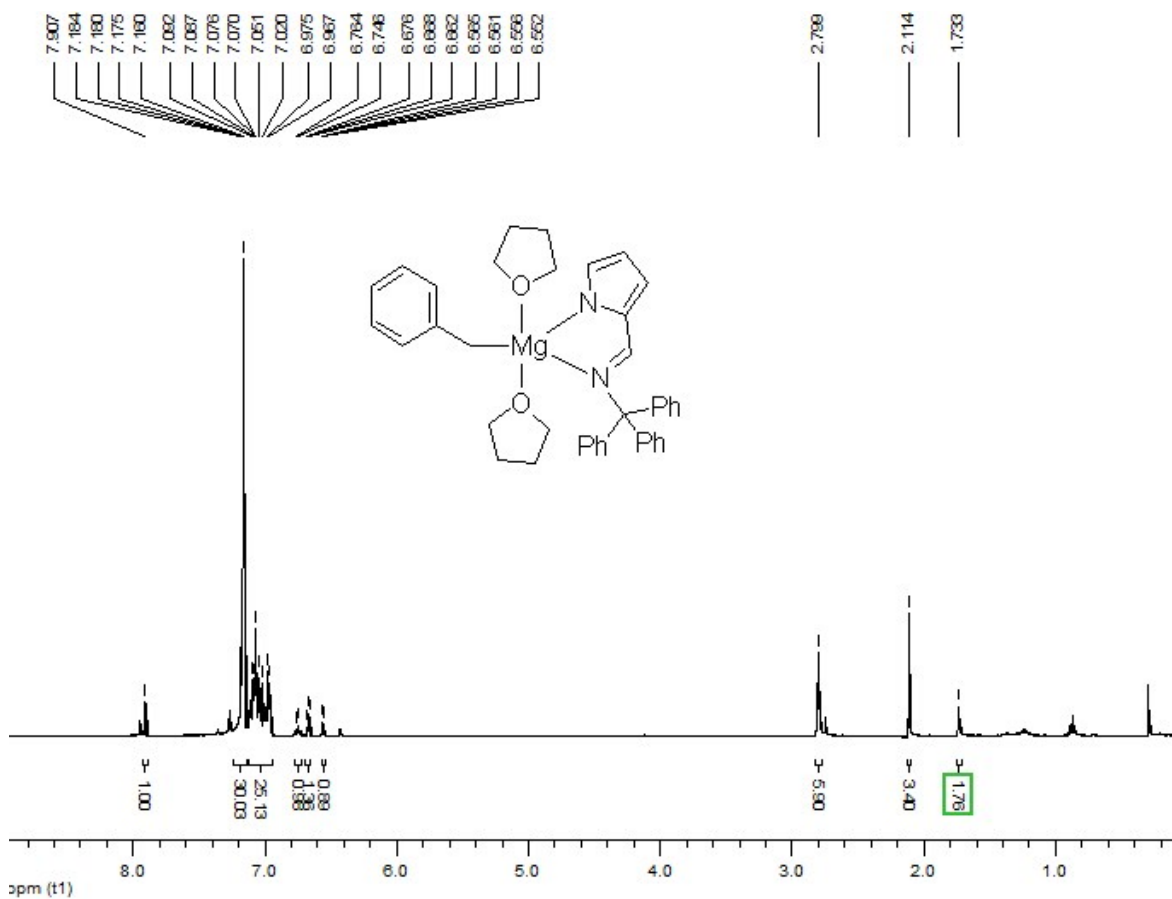

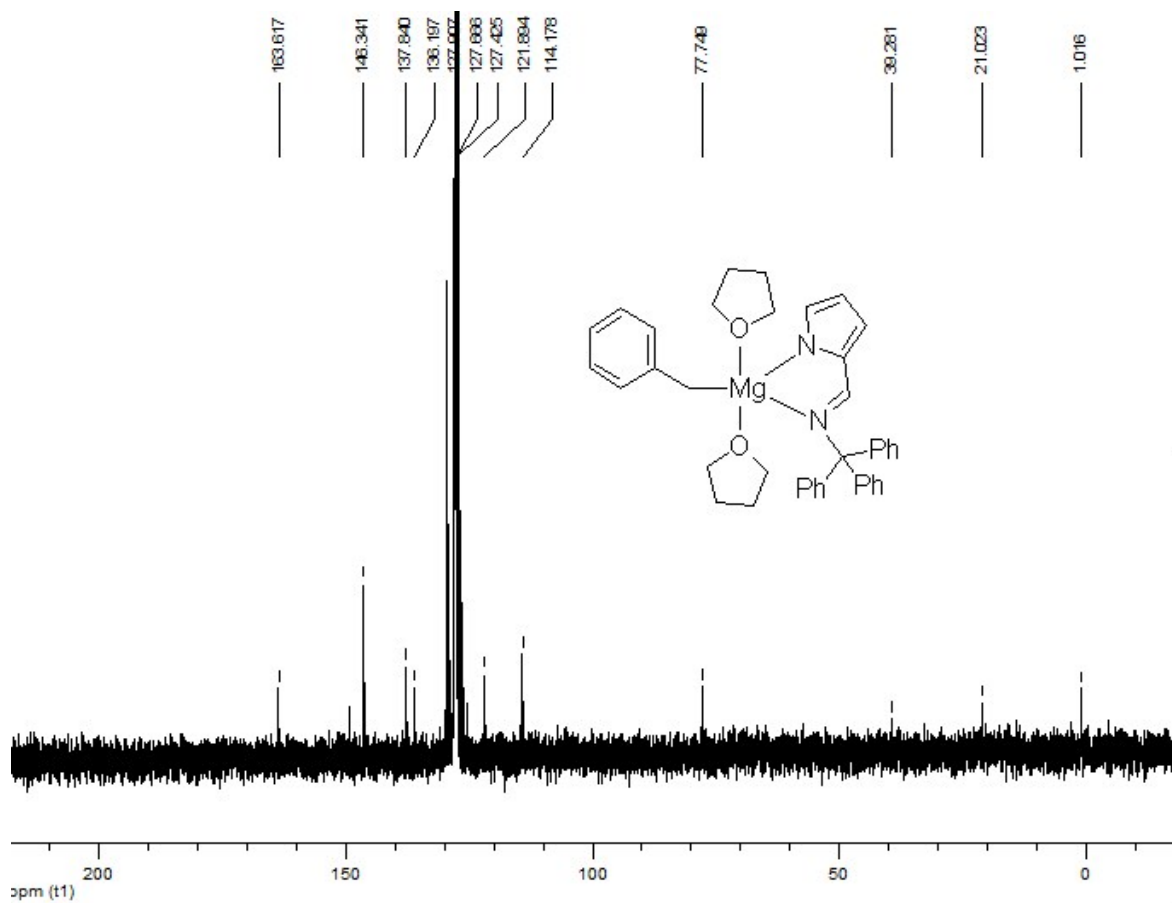

**S10.** <sup>13</sup>C NMR spectrum (100 MHz, 25°C, C<sub>6</sub>D<sub>6</sub>) of [**2**-{(Ph<sub>3</sub>CN=CH)C<sub>4</sub>H<sub>3</sub>N} {PhCH<sub>2</sub>}Mg(THF)<sub>2</sub>] (**5**)

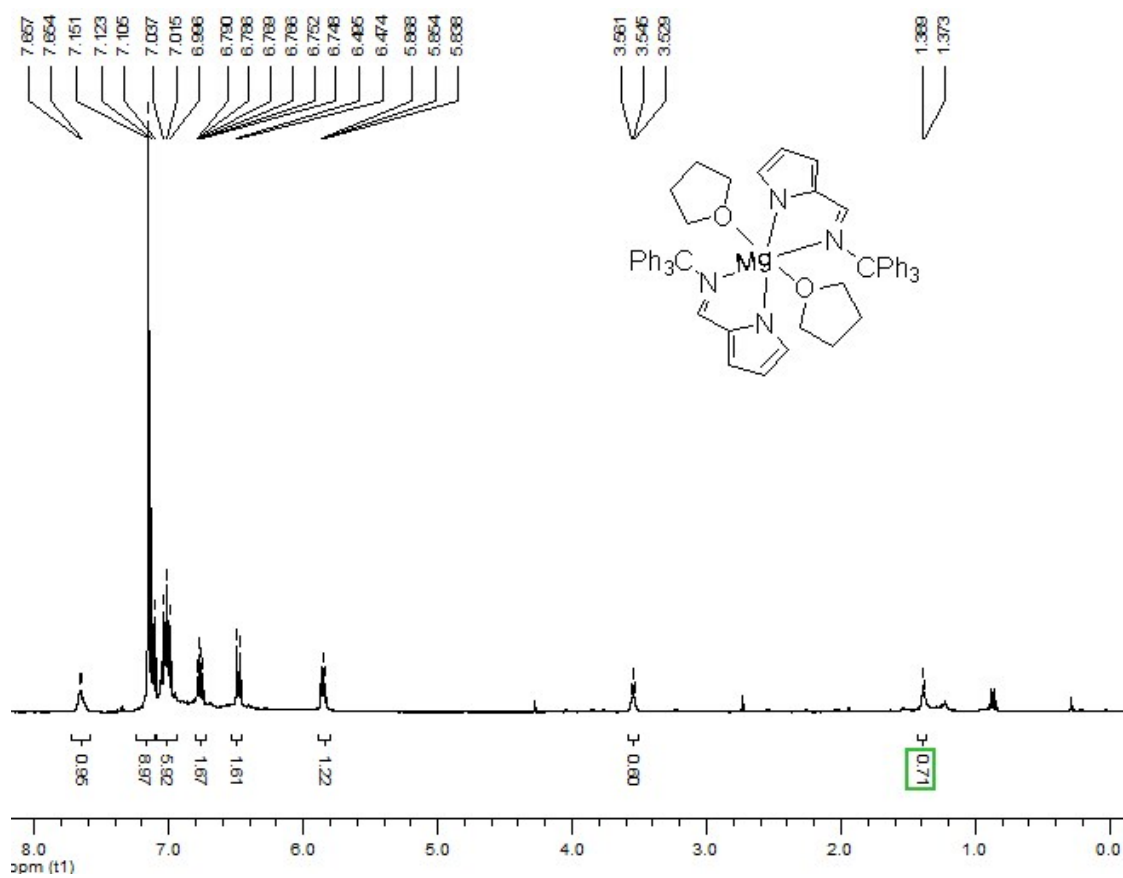

**S11.** <sup>1</sup>H NMR spectrum (400 MHz, 25°C, C<sub>6</sub>D<sub>6</sub>) of  $[\{2-(\text{Ph}_3\text{CN}=\text{CH})\text{C}_4\text{H}_3\text{N}\}_2\text{Mg}(\text{THF})_2]$  (6)

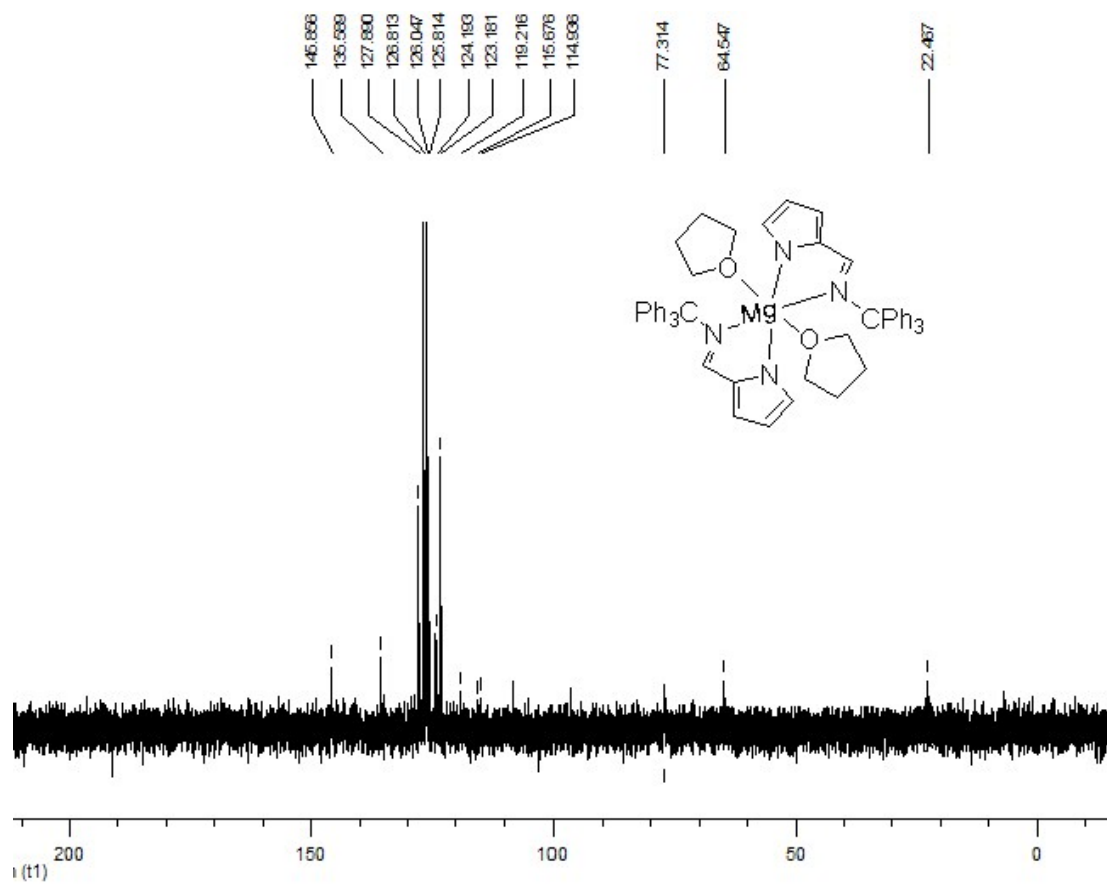

**S12.** <sup>13</sup>C NMR spectrum (100 MHz, 25°C, C<sub>6</sub>D<sub>6</sub>) of [**2**-(Ph<sub>3</sub>CN=CH)C<sub>4</sub>H<sub>3</sub>N]<sub>2</sub>Mg(THF)<sub>2</sub> (**6**)



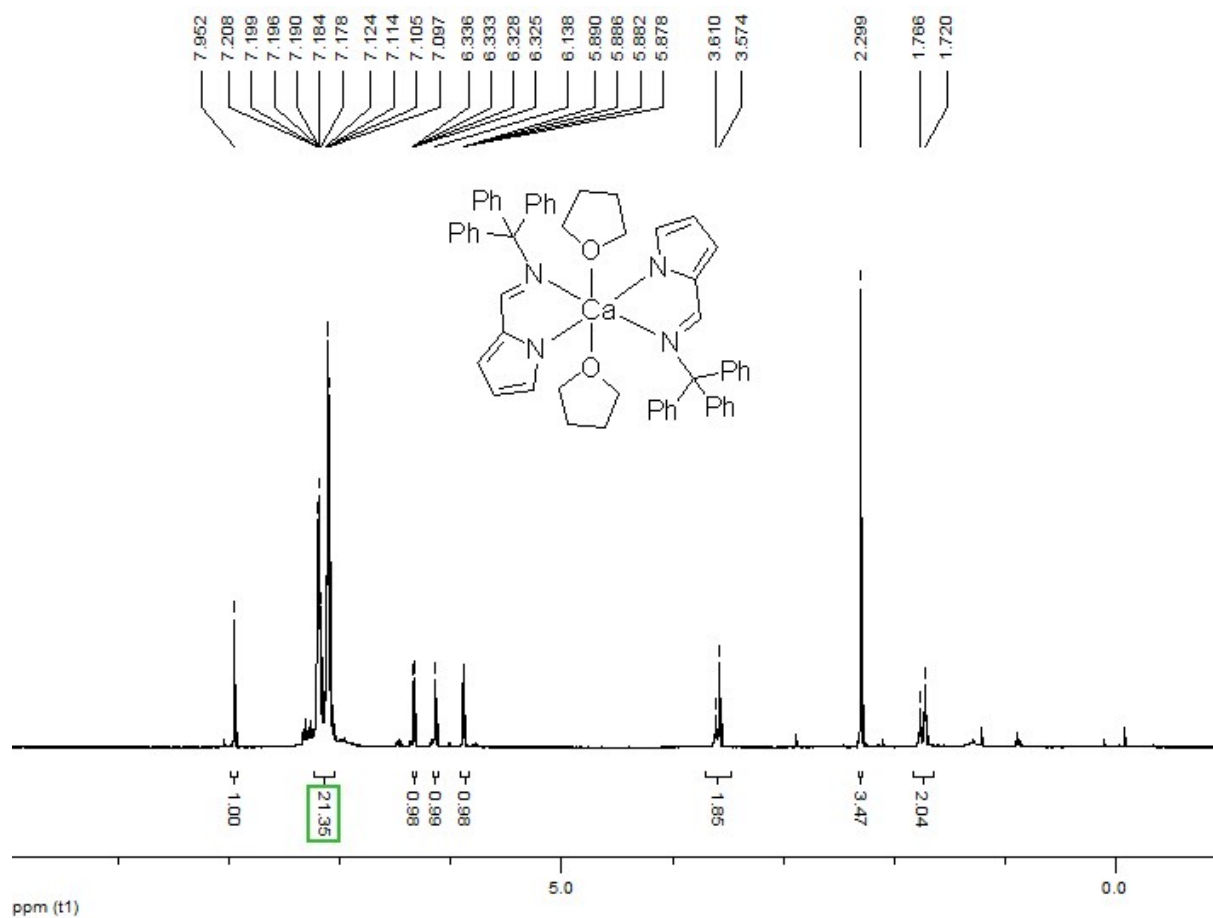

**S13.** <sup>1</sup>H NMR spectrum (400 MHz, 25°C, C<sub>6</sub>D<sub>6</sub>) of [ $\{2\text{-(Ph}_3\text{CN=CH)C}_4\text{H}_3\text{N}\}_2\text{Ca(THF)}_2$ ] (7)

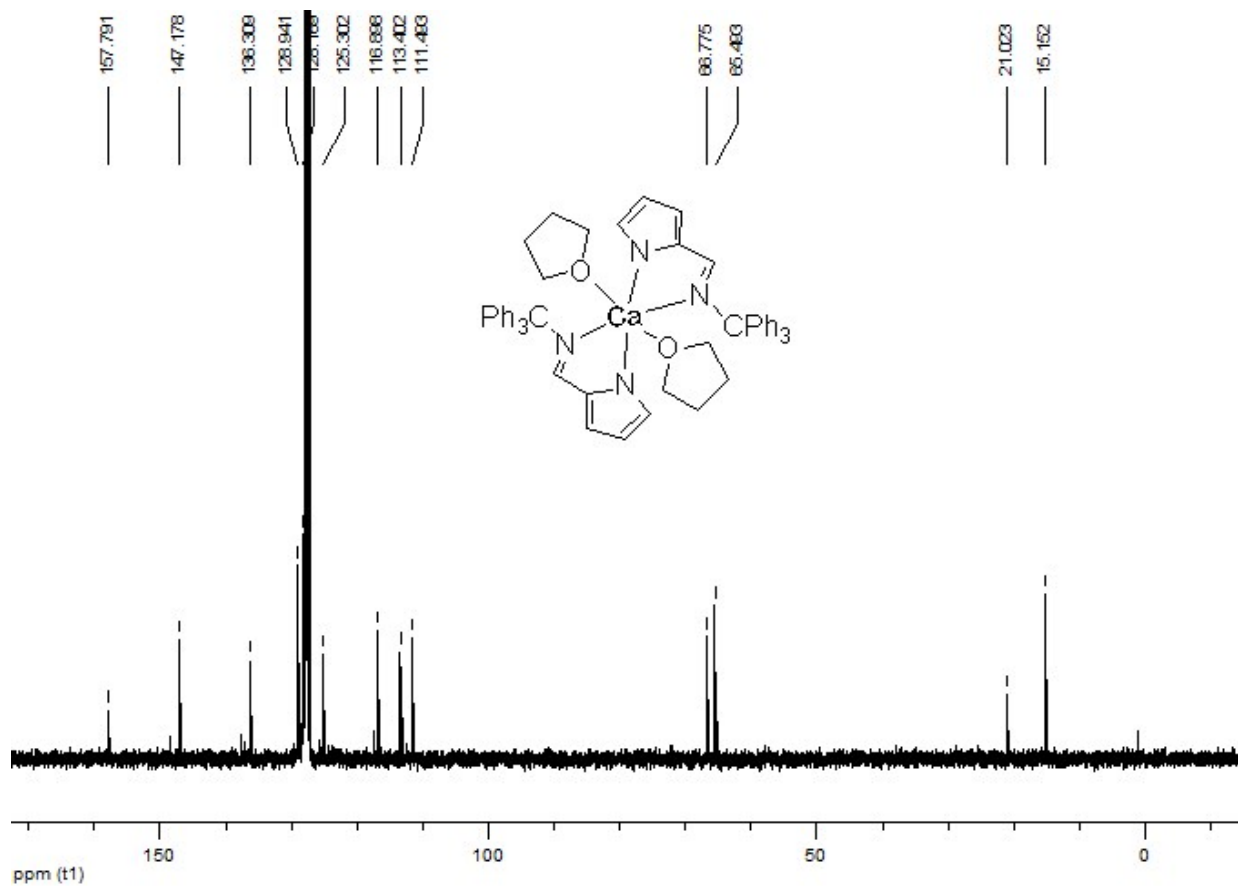

**S14.**  $^{13}\text{C}$  NMR spectrum (100 MHz, 25°C,  $\text{C}_6\text{D}_6$ ) of  $[\{2\text{-}(\text{Ph}_3\text{CN}=\text{CH})\text{C}_4\text{H}_3\text{N}\}_2\text{Ca}(\text{THF})_2]$  (7)

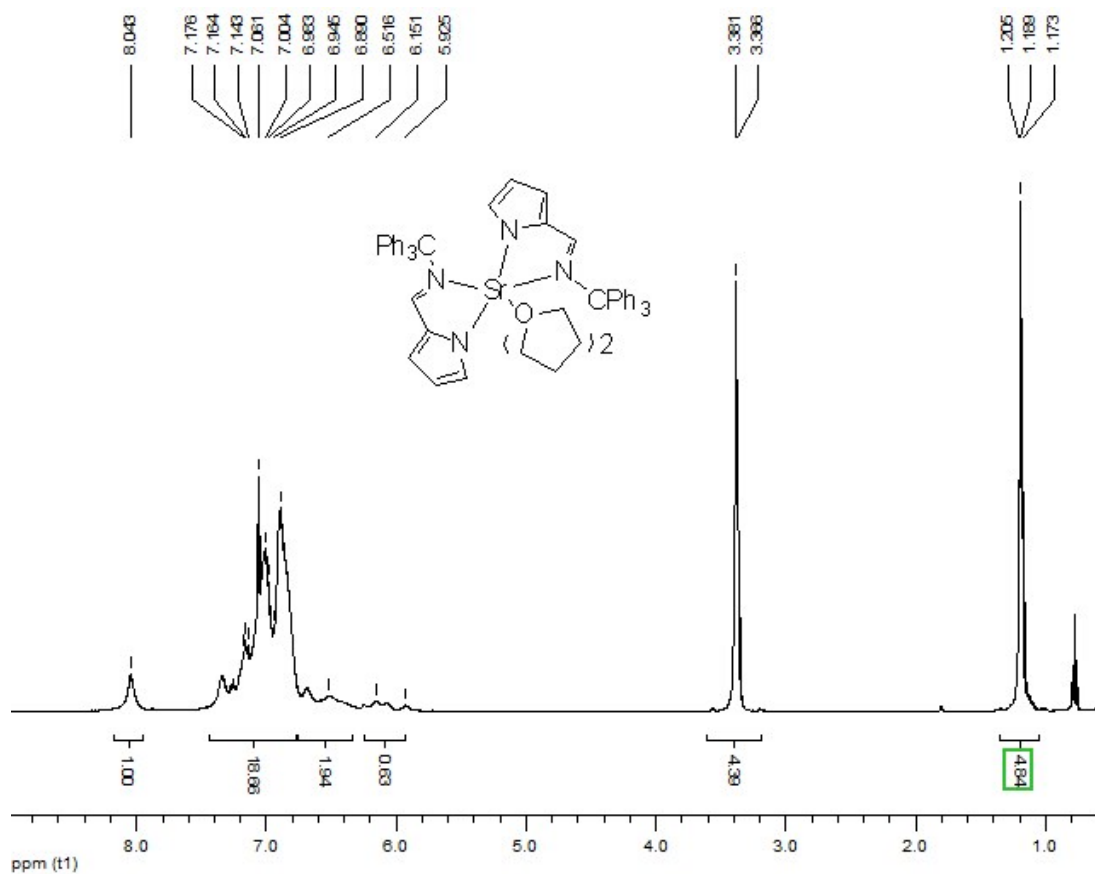

**S15.**  $^1\text{H}$  NMR spectrum (400 MHz, 25°C,  $\text{C}_6\text{D}_6$ ) of  $[\{2-(\text{Ph}_3\text{CN}=\text{CH})\text{C}_4\text{H}_3\text{N}\}_2\text{Sr}(\text{THF})_2]$  (**8**)

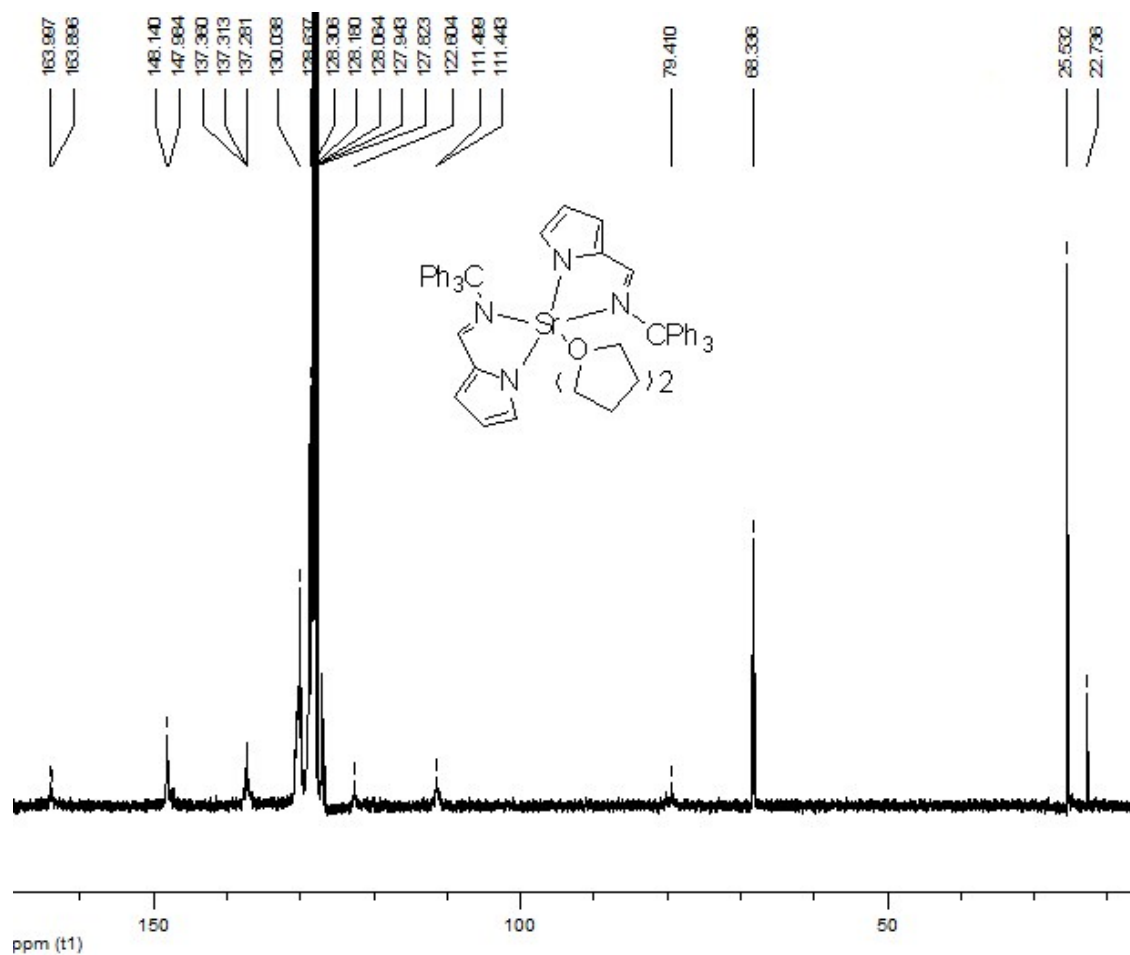

**S16.**  $^{13}\text{C}$  NMR spectrum (100 MHz, 25°C,  $\text{C}_6\text{D}_6$ ) of  $[\{2\text{-(Ph}_3\text{CN=CH)C}_4\text{H}_3\text{N}\}_2\text{Sr(THF)}_2]$  (**8**)

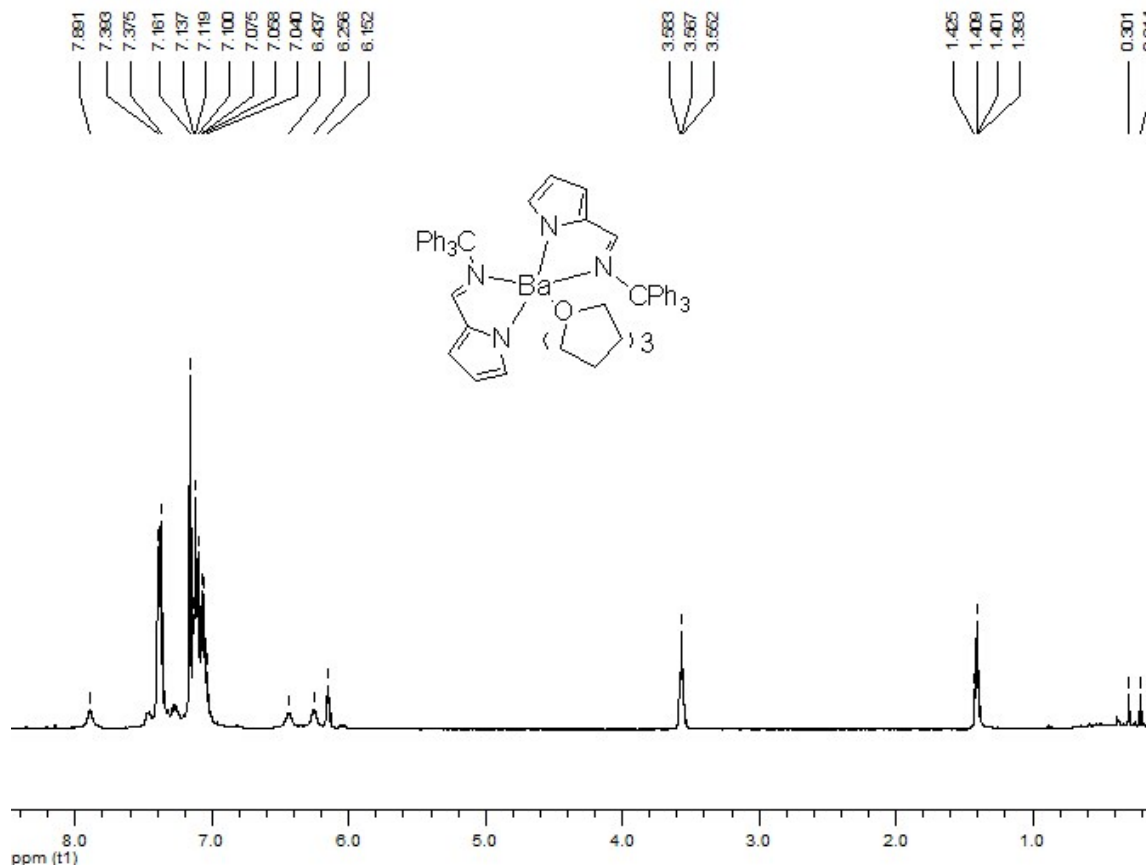

**S17.** <sup>1</sup>H NMR spectrum (400 MHz, 25°C, C<sub>6</sub>D<sub>6</sub>) of [ $\{2-(\text{Ph}_3\text{CN}=\text{CH})\text{C}_4\text{H}_3\text{N}\}_2\text{Ba}(\text{THF})_3$ ] (**9**)

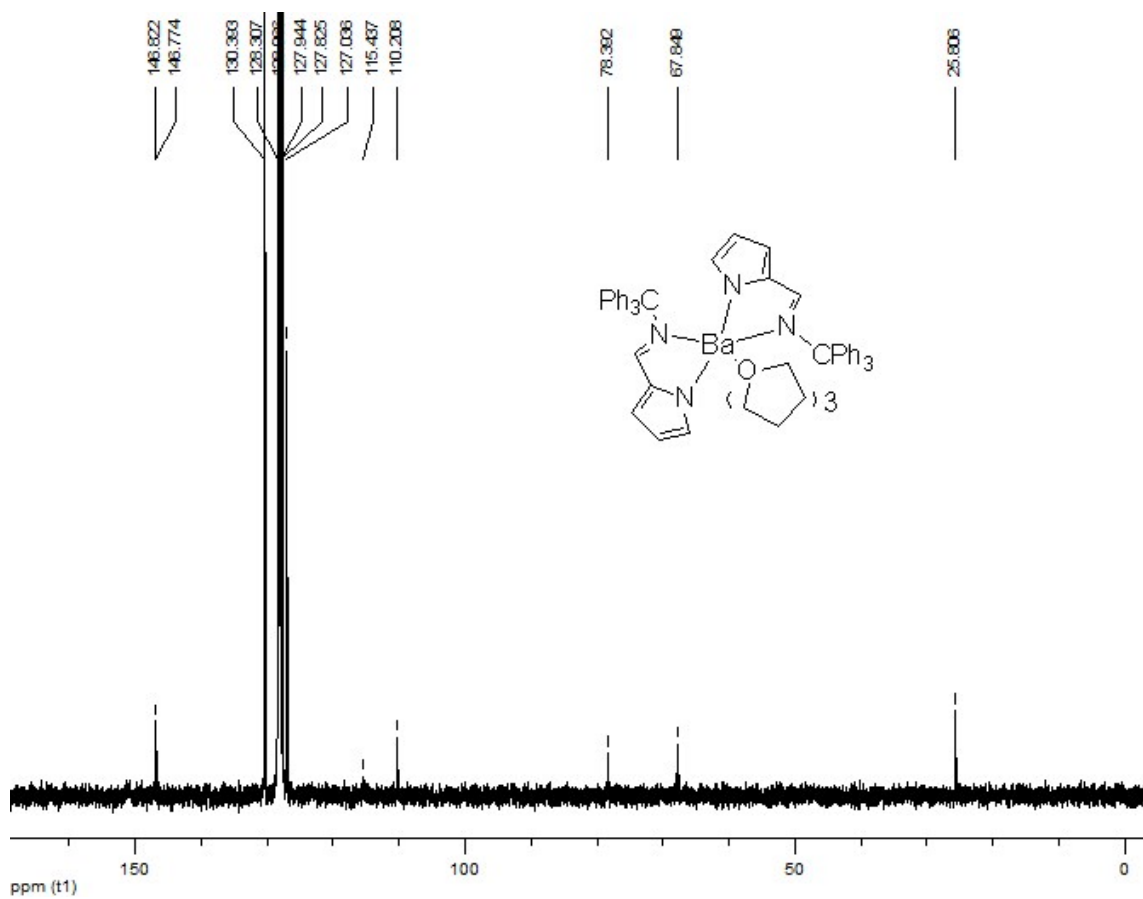

S18. <sup>13</sup>C NMR spectrum (100 MHz, 25°C, C<sub>6</sub>D<sub>6</sub>) of [ $\{2-(\text{Ph}_3\text{CN}=\text{CH})\text{C}_4\text{H}_3\text{N}\}_2\text{Ba}(\text{THF})_3$ ] (**9**)

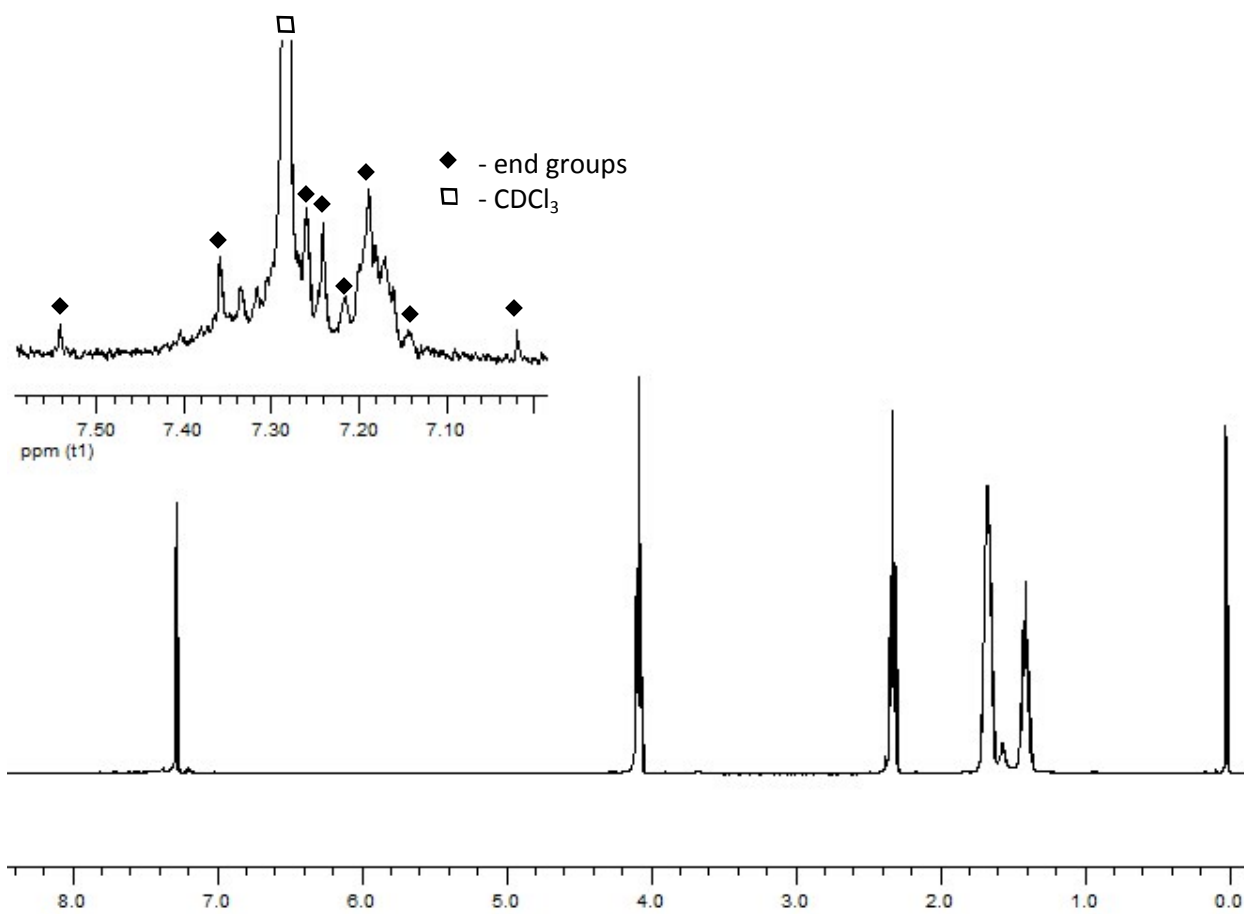

**S19.** <sup>1</sup>H NMR spectrum (400 MHz, 25°C, CDCl<sub>3</sub>) of Poly(ε-Caprolactone) initiated by complex (9)

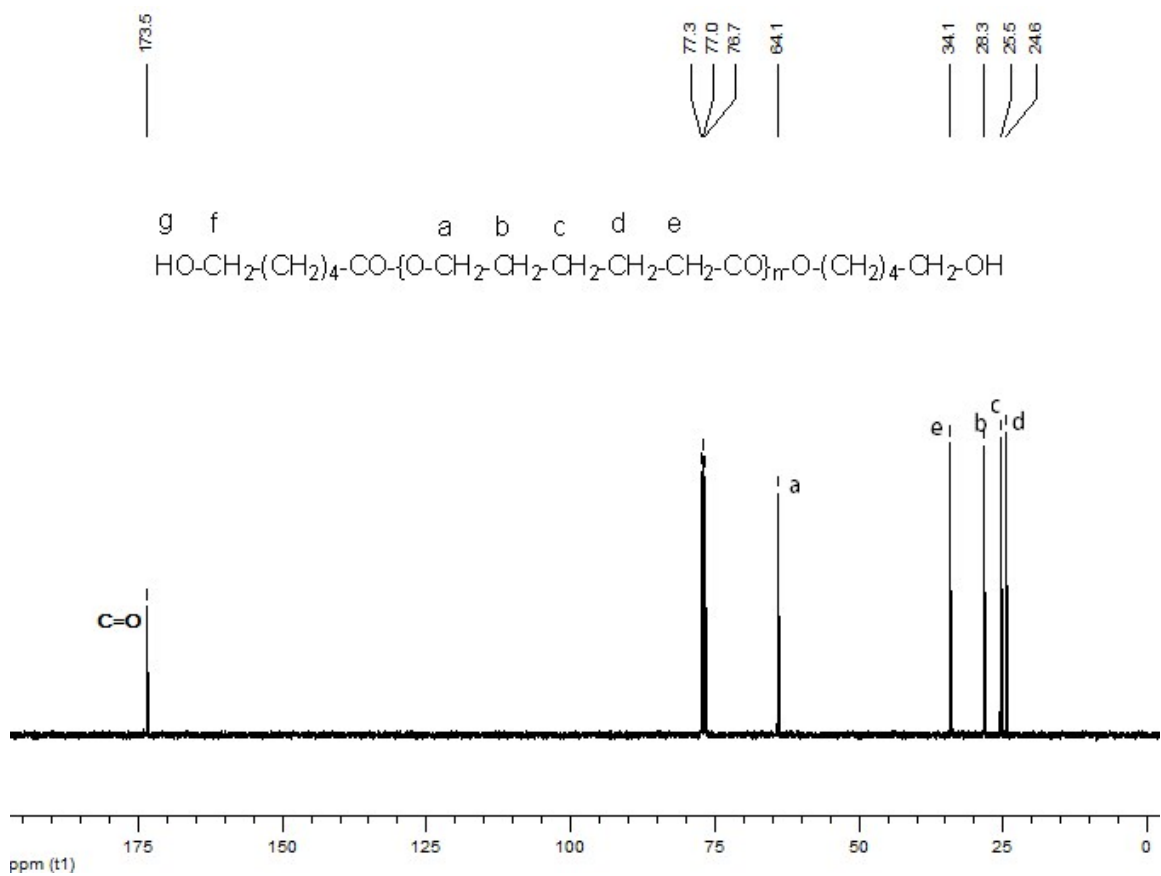

**S20.**  $^{13}\text{C}$  NMR spectrum (100 MHz, 25°C,  $\text{CDCl}_3$ ) of Poly( $\epsilon$ -Caprolactone)
